# Supplementary material
Source: Springer Nature journal article supplement (https://www.springermedizin.de/resource/supplementary/12950_2013_361_MOESM1_ESM.pdf/9557674)

# HeKa Cell Viability

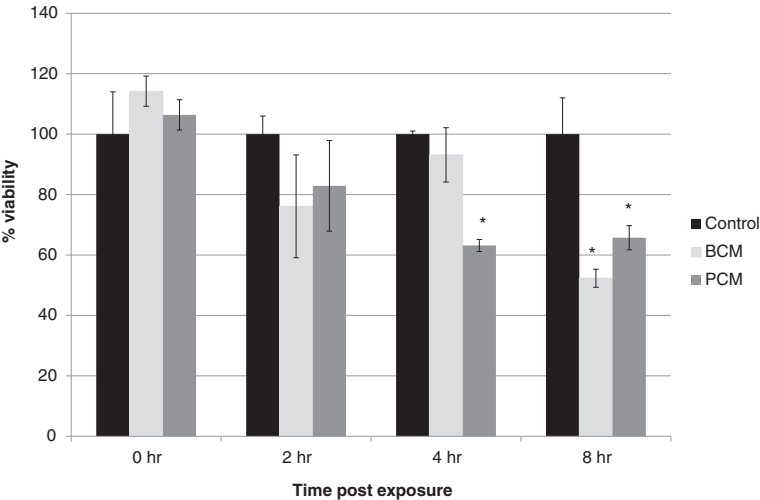

Supplement: MOESM1 [file 9557674]
